# Supplementary material for: The application of advanced narrative fusion PBL in the teaching of Obstetrics and Gynecology Nursing theory course
Source: Research Square preprint supplement (doi:10.21203/rs.3.rs-6809618/v1), 2025-07-18
Supplement: Supplementary file 1 [file 5b9a55bcffa96b8729a0f12a.docx]

| Course satisfaction questionnaire | | | | | |
| --- | --- | --- | --- | --- | --- |
|  | Very dissatisfied | Dissatisfied | Generally | Satisfied | Very satisfied |
| The step-by-step narrative teaching method combined with PBL teaching design is logically clear and stimulates my interest in learning. |  |  |  |  |  |
| Teachers can effectively control the classroom and stimulate the classroom atmosphere. |  |  |  |  |  |
| The narrative background was naturally integrated with the PBL questions, enhancing my sense of immersion in the scenario and my sense of nursing responsibility. |  |  |  |  |  |
| Progressive narrative teaching combined with PBL teaching has enhanced my classroom participation and willingness to collaborate in teams. |  |  |  |  |  |
| Advanced narrative teaching combined with PBL teaching has enabled me to better understand patient needs. |  |  |  |  |  |
